# Supplementary material
Source: Springer Nature journal article supplement (https://www.springermedizin.de/resource/supplementary/12936_2012_2628_MOESM1_ESM.pdf/9543280)

**A**

Temperature (C) and Rainfall (mm)

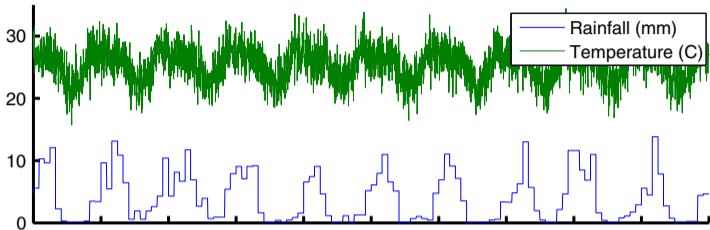**B**

Daily EIR by species

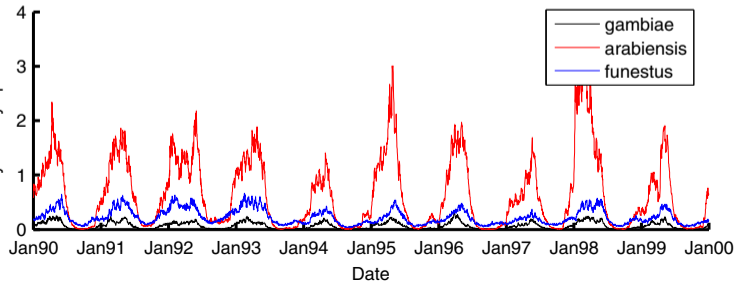

Supplement: MOESM1 [file 9543280]
